# Supplementary material for: CRISPR/Cas13a-assisted amplification-free miRNA biosensor via dark-field imaging and magnetic gold nanoparticles
Source: Royal Society of Chemistry journal article supplement (doi:10.1039/d4sd00081a), 2024-01-01
Supplement: d4sd00081a1.pdf [file d4sd00081a1.pdf]

## Supporting Information

### **CRISPR/Cas13a-assisted amplification-free miRNA biosensor via dark-field imaging and magnetic gold nanoparticles**

Jae-Jun Kim<sup>1†</sup>, Jae-Sang Hong<sup>1†</sup>, Hyunho Kim<sup>1</sup>, Moonhyun Choi<sup>1</sup>, Ursula Winter<sup>1</sup>, Hakho Lee<sup>1,2</sup>, Hyungsoon Im<sup>1,2\*</sup>

<sup>1</sup> Center for Systems Biology, Massachusetts General Hospital, Boston, MA, 02114, USA

<sup>2</sup> Department of Radiology, Massachusetts General Hospital, Boston, MA, 02114, USA

†These authors contributed equally to the manuscript.

\*Corresponding author:

Hyungsoon Im ([im.hyungsoon@mgh.harvard.edu](mailto:im.hyungsoon@mgh.harvard.edu))

## SUPPLEMENTARY FIGURES

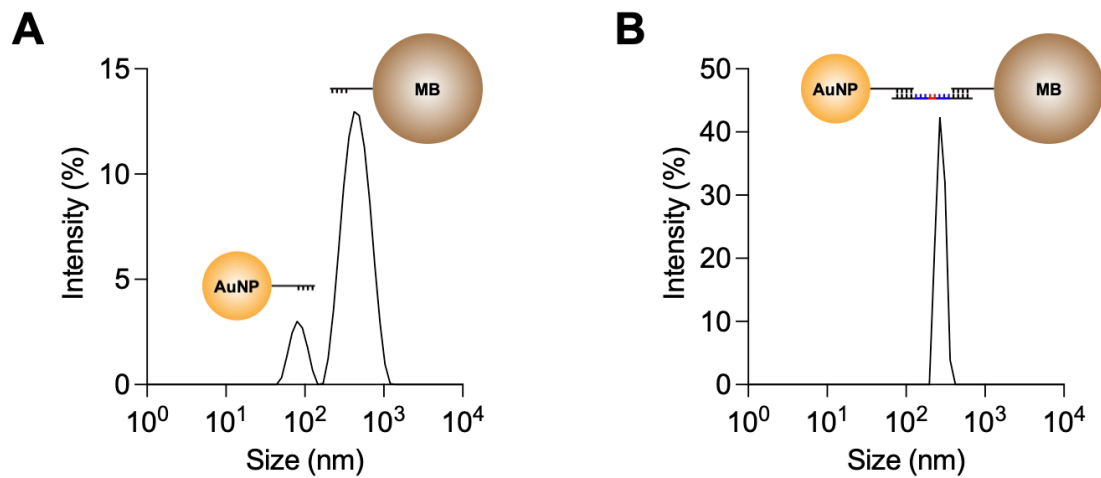

**Figure S1.** Dynamic Light Scattering (DLS) measurement results for mixture of magnetic beads (MBs) and gold nanoparticles (AuNPs) without (A) or with (B) a linker.

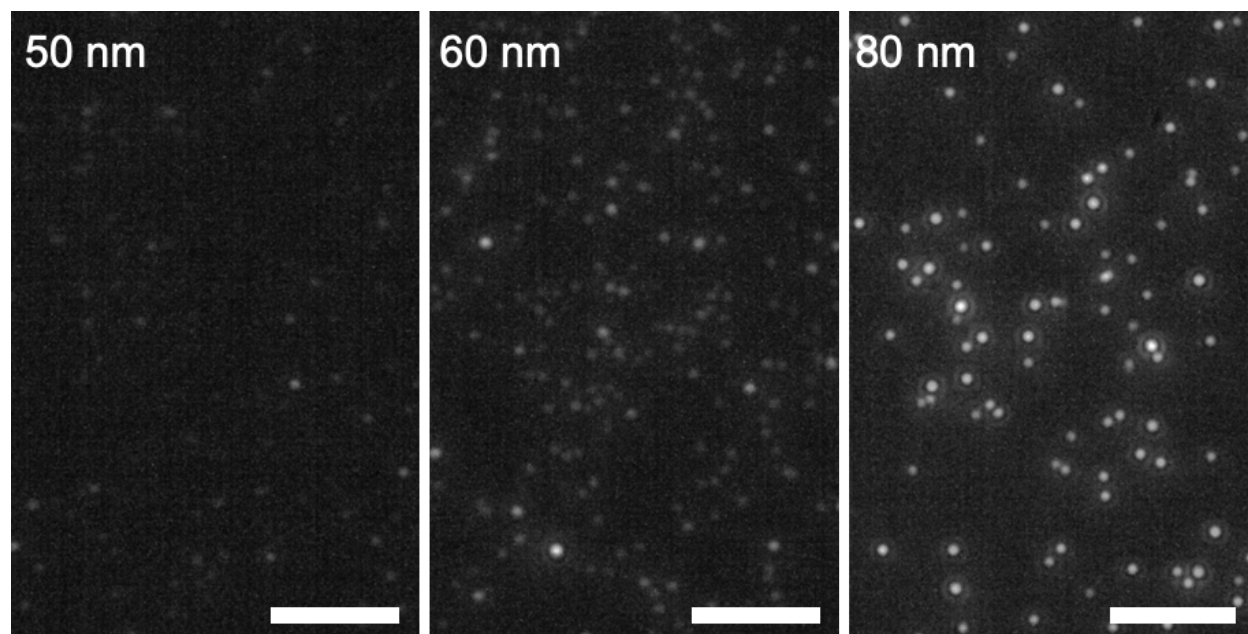

**Figure S2.** Dark-field (DF) images of gold nanoparticles (AuNPs) of different sizes (50 nm, 60 nm, and 80 nm) captured using a portable DF imaging system. Scale bar, 100  $\mu\text{m}$ .

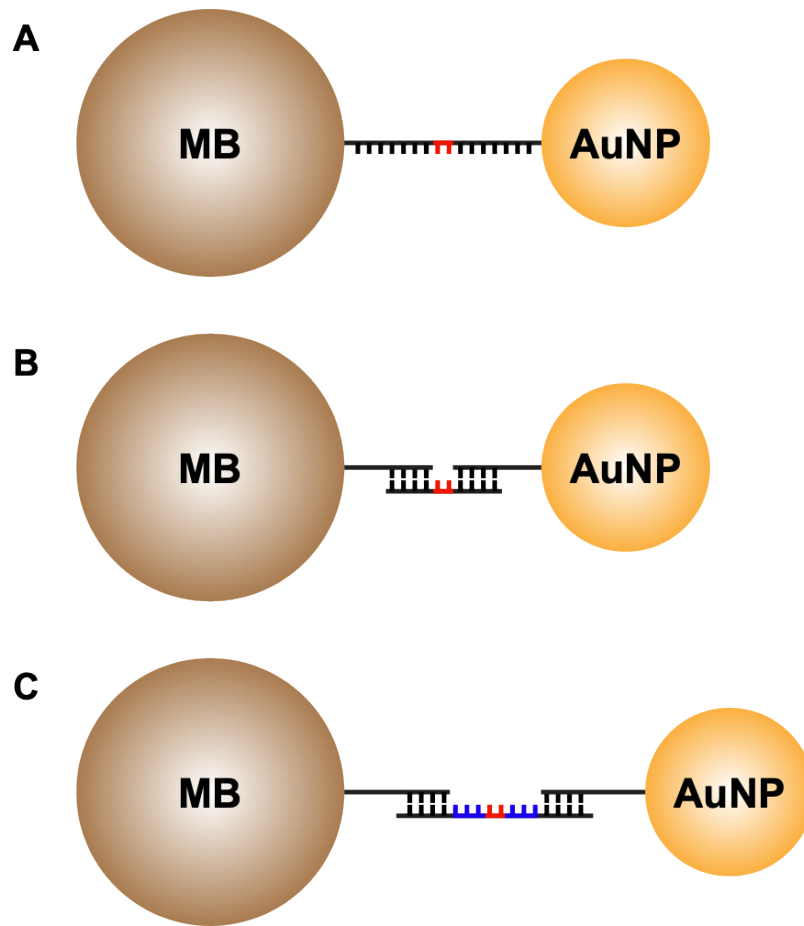

**Figure S3. Hybridization strategies for linking magnetic beads (MBs) and gold nanoparticles (AuNPs) using nucleic acid linkers.** **A.** Direct linking of MBs and AuNPs with a single-stranded DNA/RNA/DNA linker. **B-C.** Sandwich hybridization with bridges without (**B**) or with (**C**) poly-T. DNA and RNA sequences are denoted in black and red, respectively. Poly-T sequences are highlighted in blue.

**A**

| Concentration | Mock             | 0.1 fmole<br>5 pM | 0.2 fmole<br>10 pM | 0.5 fmole<br>25 pM |
|---------------|------------------|-------------------|--------------------|--------------------|
| Experiment 1  | 362.3            | 457.3             | 446.3              | 521.0              |
| Experiment 2  | 387.0            | 434.3             | 408.0              | 573.3              |
| Experiment 3  | 437.7            | 557.3             | 484.3              | 589.0              |
| Concentration | 1 fmole<br>50 pM | 2 fmole<br>100 pM | 3 fmole<br>150 pM  | 5 fmole<br>250 pM  |
| Experiment 1  | 1073.7           | 3027.7            | 4625.3             | 9330.3             |
| Experiment 2  | 1128.3           | 2264.0            | 4203.7             | 9011.7             |
| Experiment 3  | 1674.0           | 2835.3            | 4156.0             | 8424.7             |

$$\begin{aligned}
 \text{LOD threshold} &= \text{mean} + 3 \times \text{S.D.} \\
 &= 395.7 + 3 \times 38.4 \\
 &= \mathbf{510.9}
 \end{aligned}$$

**B**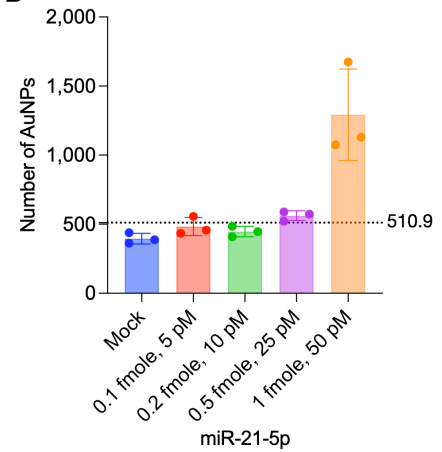

**Figure S4. Calculation of the limit of the detection. A.** Signal values for different concentrations of miR-21-5p and negative control (mock) to determine the limit of detection (LOD) threshold by the mean + 3 times the standard deviation. Based on the threshold value (510.9), we determined the LOD as 0.5 fmole (25 pM). **B.** Bar graph showing the signal values from different miR-21-5p concentrations and the LOD threshold value.

## Supplemental Table S1. Sequences of oligomers used in this study.

| Name                  | Sequence (5' to 3') <sup>abc</sup>                                          |
|-----------------------|-----------------------------------------------------------------------------|
| miR-21-5p-F           | TAGCTTATCAGACTGATGTTGA                                                      |
| U6 snRNA-F            | CAAATTCGTGAAGCGTTC CA                                                       |
| universal-R           | AGGCAGTGGTATCAACGCAGA                                                       |
| miR-RT-adaptor        | AGGCAGTGGTATCAACGCAGAGTACTTTTTTTTTTTTTTTTTTTTTTTTTTTTTTTTTTTTTV             |
| T7-universal upper    | TAATACGACTCACTATAG                                                          |
| T7-bottom miR-21-5p   | TAGCTTATCAGACTGATGTTGAGTTTTAGTCCCCTTCATTTTTGGGGTGGTCTAAATCTATAGTGAGTCGTATTA |
| miR-21-5p (WT)        | phospho-uagcuuau <u>cagacug</u> auguuga                                     |
| miR-21-5p (SM)        | phospho-uagcuuau <u>cggacug</u> auguuga                                     |
| miR-21-5p (DM)        | phospho- <u>u</u> gcuuau <u>cggacug</u> auguuga                             |
| miR-9-5p              | phospho-ucuu <u>uggu</u> uau <u>cuagc</u> uauuga                            |
| miR-421               | phospho-aucaacagacauu <u>aaugggcgc</u>                                      |
| DRD probe             | FAM-TA <u>uGC</u> -Quencher                                                 |
| Linker only           | biotin-GATGGGCAGACAGGGTTAAGTTTTTTTT <u>uu</u> TAGGACTCGTGCAGCTAAGG-thiol    |
| MB linker             | biotin-TTTTTTTTTT <u>GATGGGCAGACAGGGTTAAG</u>                               |
| AuNP linker           | TAGGACTCGTGCAGCTAAGTTTTTTTTTTT-thiol                                        |
| Bridge without poly-T | CCTTAGCTGCACGAGTCTAT <u>uu</u> CCTTAACCTGTCTGCCCATC                         |
| Bridge with poly-T    | CCTTAGCTGCACGAGTCTATTTTTTTTT <u>uu</u> TTTTTTTTTCTTAACCTGTCTGCCCATC         |
| Capture probe         | CCTTAGCTGCACGAGTCTATTTTTTTTTTTTTTTTT-biotin                                 |

<sup>a</sup> V = A, C, or G; N = A, C, G, or T

<sup>b</sup> Lower case letters denote RNA.

<sup>c</sup> Underline letters indicate mismatch.
